# Supplementary material
Source: PubMed Central journal article supplement (PMC8579373)

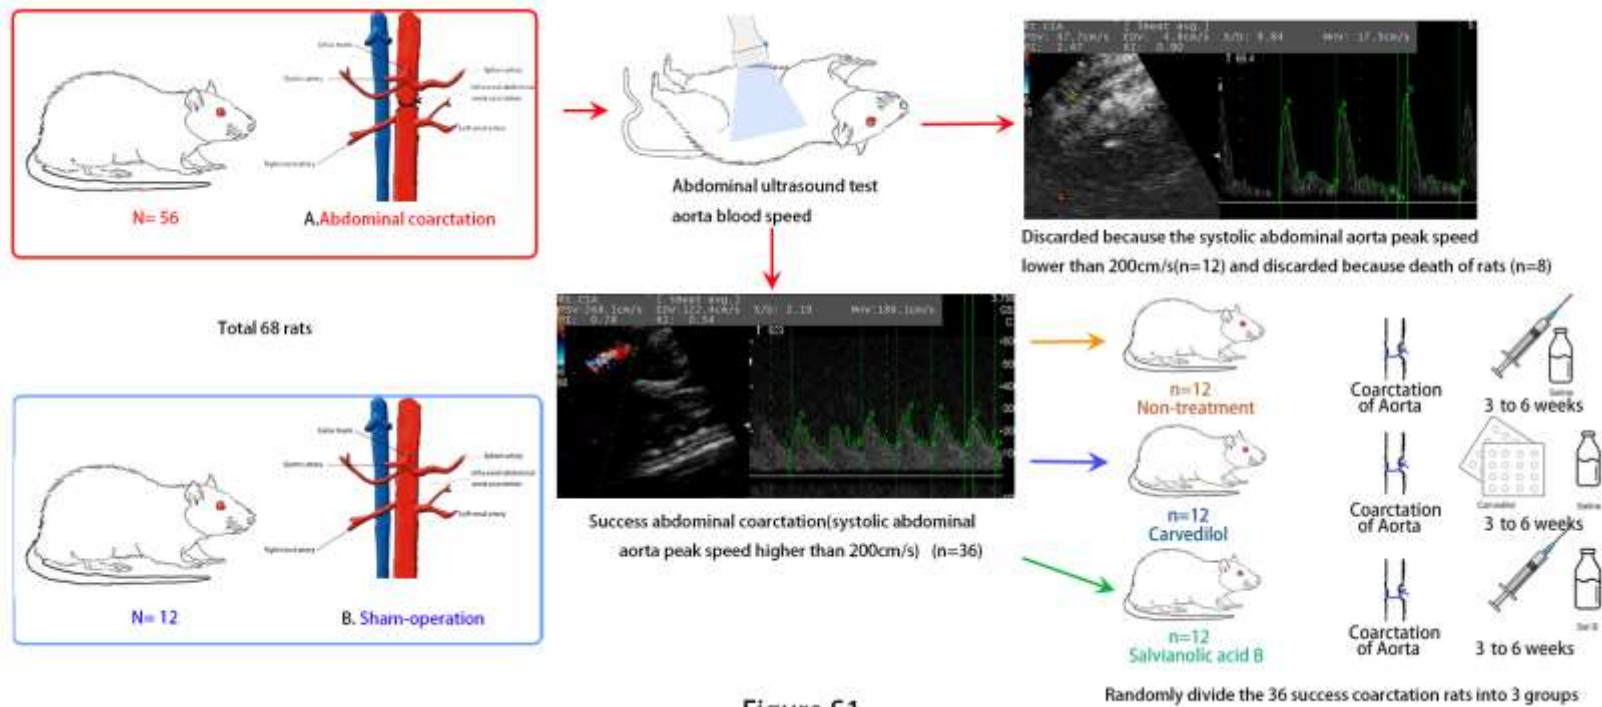

Figure S1

Supplementary Figure (S1). Study design and detailed procedures of the experiment

Supplement: sj-pdf-2-ult-10.1177_1742271X20987584.pdf [file sj-pdf-2-ult-10.1177_1742271X20987584.pdf]
